# Supplementary material
Source: HighWire-hosted journal article supplement (http://www.ajnr.org/highwire/filestream/58690/field_highwire_adjunct_files/0/17-00803.pdf)
Supplement: 17-00803.pdf [file 17-00803.pdf]

**On-line Table: Pearson correlation of brain metabolites with neurocognitive test scores<sup>a</sup>**

|         | Trail-Making Test B      |     |                         | Grooved Pegboard Non-Dominant Hand |     |    | Digit Symbol Test        |                          |                          | Hopkins Verbal Learning Test Delayed Recall |     |    | Stroop                  |                         |                          |
|---------|--------------------------|-----|-------------------------|------------------------------------|-----|----|--------------------------|--------------------------|--------------------------|---------------------------------------------|-----|----|-------------------------|-------------------------|--------------------------|
|         | FWM                      | PCC | PC                      | FWM                                | PCC | PC | FWM                      | PCC                      | PC                       | FWM                                         | PCC | PC | FWM                     | PCC                     | PC                       |
| NAA     | 0.38 (.01) <sup>b</sup>  | NS  | NS                      | 0.35 (.01) <sup>b</sup>            | NS  | NS | 0.46 (.006) <sup>b</sup> | 0.44 (.008) <sup>b</sup> | 0.46 (.001) <sup>b</sup> | NS                                          | NS  | NS | NS                      | NS                      | 0.38 (.02) <sup>b</sup>  |
| NAA/Cr  | 0.36 (.01) <sup>b</sup>  | NS  | NS                      | NS                                 | NS  | NS | 0.35 (.04) <sup>b</sup>  | 0.33 (.04) <sup>b</sup>  | 0.31 (.04) <sup>b</sup>  | NS                                          | NS  | NS | NS                      | 0.37 (.03) <sup>b</sup> | 0.33 (.04) <sup>b</sup>  |
| tNAA    | 0.43 (.003) <sup>b</sup> | NS  | NS                      | 0.45 (.002) <sup>b</sup>           | NS  | NS | 0.48 (.004) <sup>b</sup> | NS                       | 0.35 (.01) <sup>b</sup>  | NS                                          | NS  | NS | NS                      | NS                      | NS                       |
| tNAA/Cr | 0.41 (.005) <sup>b</sup> | NS  | NS                      | 0.35 (.01) <sup>b</sup>            | NS  | NS | 0.39 (.02) <sup>b</sup>  | NS                       | NS                       | NS                                          | NS  | NS | NS                      | 0.35 (.04) <sup>b</sup> | NS                       |
| Glu     | 0.3 (.04) <sup>b</sup>   | NS  | NS                      | 0.36 (.01) <sup>b</sup>            | NS  | NS | 0.48 (.003) <sup>b</sup> | NS                       | 0.46 (.001) <sup>b</sup> | NS                                          | NS  | NS | NS                      | 0.4 (.01) <sup>b</sup>  | 0.46 (.005) <sup>b</sup> |
| Glu/Cr  | NS                       | NS  | 0.34 (.04) <sup>b</sup> | NS                                 | NS  | NS | NS                       | NS                       | 0.32 (.02) <sup>b</sup>  | NS                                          | NS  | NS | 0.32 (.03) <sup>b</sup> | 0.38 (.02) <sup>b</sup> | NS                       |
| Glx     | 0.29 (.05) <sup>b</sup>  | NS  | NS                      | 0.35 (.01) <sup>b</sup>            | NS  | NS | 0.42 (.01) <sup>b</sup>  | NS                       | 0.32 (.03) <sup>b</sup>  | NS                                          | NS  | NS | NS                      | NS                      | 0.36 (.03) <sup>b</sup>  |
| Glx/Cr  | NS                       | NS  | NS                      | NS                                 | NS  | NS | NS                       | NS                       | NS                       | NS                                          | NS  | NS | NS                      | NS                      | NS                       |
| Cho     | NS                       | NS  | NS                      | NS                                 | NS  | NS | NS                       | NS                       | NS                       | NS                                          | NS  | NS | NS                      | NS                      | NS                       |
| Cho/Cr  | NS                       | NS  | NS                      | NS                                 | NS  | NS | NS                       | NS                       | NS                       | NS                                          | NS  | NS | NS                      | NS                      | 0.4 (.01) <sup>b</sup>   |
| mIns    | NS                       | NS  | NS                      | NS                                 | NS  | NS | NS                       | NS                       | -0.37 (.02) <sup>b</sup> | NS                                          | NS  | NS | NS                      | NS                      | NS                       |
| mIns/Cr | NS                       | NS  | NS                      | NS                                 | NS  | NS | NS                       | NS                       | NS                       | NS                                          | NS  | NS | NS                      | 0.35 (.04) <sup>b</sup> | NS                       |

**Note:**—NS indicates not significant.

<sup>a</sup> Correlation coefficients and significance (P values, in parentheses) for frontal white matter, posterior cingulate cortex, and precuneus.

<sup>b</sup> Significant (P < .05).
